# Supplementary material for: Identification of a rare Gli1+ progenitor cell population contributing to liver regeneration during chronic injury
Source: PubMed Central journal article supplement (PMC9622734; doi:10.1038/s41421-022-00474-3), 2022-11-01
Supplement: 41421_2022_474_MOESM1_ESM.pdf [file 41421_2022_474_MOESM1_ESM.pdf]

## 1 **Supplemental Information**

### 2 **Supplementary Fig. S1 (Related to Fig. 1). Gli1<sup>+</sup> cell enlargement appears differently in** 3 **different damage models.**

4 **a** The distribution of Gli1<sup>+</sup> cells were evaluated in situ in X-gal-stained sections of livers from  
5 Gli1-LacZ mice. Scale bar, 50  $\mu$ m. **b** Immunofluorescence co-staining for  $\beta$ -gal (green) with  
6 KRT19 and OPN (cholangiocyte marker, red), Alb and GS (hepatocyte marker, red), VE-CAD  
7 (endothelial marker, red) and F4/80 (macrophage marker, red) in liver sections. Slides were  
8 counterstained with DAPI (blue). Scale bar, 50  $\mu$ m. **c** Immunostaining for  $\beta$ -gal (green),  
9 EpCAM (cholangiocyte marker, red), and  $\alpha$ -SMA (activated HSC marker, red) in liver sections.  
10 Scale bar, 50  $\mu$ m. Right panels: Quantification of the percentage of Gli1<sup>+</sup> cells expressing  
11 EpCAM and  $\alpha$ -SMA. Means  $\pm$  SEM (n = 3). **d** Experimental design and representative  
12 histological images of X-gal<sup>+</sup> cells in sections of sham or PH livers. Scale bar, 50  $\mu$ m. Right  
13 panels: Quantification of the number of X-gal<sup>+</sup> cells in sham or PH livers. Means  $\pm$  SEM (n = 5).  
14 **e** Representative histological images of X-gal<sup>+</sup> cells in liver sections and the number of X-gal<sup>+</sup>  
15 liver cells from control or CCl<sub>4</sub>-treated mice. Scale bar, 50  $\mu$ m. Right panels: Quantification of  
16 the number of X-gal<sup>+</sup> cells. Means  $\pm$  SEM (n = 5). **f** Representative histological images of X-  
17 gal<sup>+</sup> cells in liver sections from control or 10 $\times$  CCl<sub>4</sub>-treated mice. Scale bar, 50  $\mu$ m. Right  
18 panels: Quantification of the number of X-gal<sup>+</sup> cells. Means  $\pm$  SEM (n = 5). \**p* < 0.05. **g, h**  
19 Representative histological images of X-gal<sup>+</sup> cells in liver sections from mice fed a normal diet  
20 and a 3-week CDE (**g**) or MCD (**h**) diet. Scale bar, 50  $\mu$ m. Right panels: Quantification of the  
21 number of X-gal<sup>+</sup> cells. Means  $\pm$  SEM (n = 5). \**p* < 0.05. \*\**p* < 0.01. **i** Immunofluorescence  
22 staining for  $\beta$ -gal (green) in liver sections from mice fed a normal diet and a 4-week DDC, CDE  
23 or MCD diet. Scale bar, 50  $\mu$ m.

### 24 **Supplementary Fig. S2 (Related to Fig. 1). Cell labeling in Gli1-CreER; Ai9 mice with Oil.**

25 **a** Schematic showing the experimental design. **b** Immunostaining for tdTomato (red) in liver  
26 sections from Gli1-CreER; Ai9 mice treated with Oil at various time points. Scale bar, 200  $\mu$ m.

27 **Supplementary Fig. S3 (Related to Fig. 1). Gli1<sup>+</sup> cells differentiate into hepatocytes**  
28 **during liver damage.**

29 **a** Schematic illustration of the experimental design. **b-e** Immunostaining for tdTomato (red) in  
30 liver sections at various time points after TAM administration. Scale bar, 100  $\mu$ m. **f**  
31 Quantification of the percentage of tdTomato<sup>+</sup> cells in liver sections. Means  $\pm$  SEM (n = 5). **g**  
32 Schematic showing the experimental design. **h, i** Immunostaining for tdTomato (red) in liver  
33 sections at various time points after DDC-induced injury. Scale bar, 100  $\mu$ m. **j** Quantification of  
34 the percentage of tdTomato<sup>+</sup> cells in liver sections. Means  $\pm$  SEM (n = 5). \* $p$  < 0.05. **k**  
35 Immunostaining for tdTomato (red) and HNF4 $\alpha$  (green) in serial liver sections after DDC-  
36 induced injury. Scale bar, 50  $\mu$ m. **l** Immunostaining for tdTomato (red) and KRT19 (green) or  
37 EpCAM in 50  $\mu$ m liver sections after 4 weeks of a normal diet or DDC diet. Scale bar, 50  $\mu$ m.  
38 **m** Quantification of the percentage of tdTomato<sup>+</sup> hepatocyte adjacent to the PV. Means  $\pm$  SEM  
39 (n = 4)

40 **Supplementary Fig. S4 (Related to Fig. 3). The cellular source of Gli1.**

41 **a** RNAscope analysis of hepatic expression of *Gli1* (red) and EpCAM (green) co-staining on 8-  
42 week-old WT mice. PV, portal vein. Scale bar, 50  $\mu$ m. **b** Immunofluorescence staining for  
43 tdTomato (red) and KRT19 (green) or Sox9 (green) in liver sections from Gli1-CreERT2; Ai9  
44 mice after TAM administration. Scale bar, 50  $\mu$ m. **c** Immunofluorescence staining for tdTomato  
45 (red) and F4/80 (green), HNF4 $\alpha$  (green), Alb (green) or VE-CAD (green) in liver sections from  
46 Gli1-CreERT2; Ai9 mice after TAM administration. Scale bar, 50  $\mu$ m. **d** Flow cytometric analysis  
47 of the percentage of tdTomato<sup>+</sup> cells among EpCAM<sup>+</sup> cells.

48 **Supplementary Fig. S5 (Related to Fig. 4). Analysis of scRNA-seq data.**

49 **a** Doublets were identified and filtered by DoubletDecon and DoubletFinder. **b** Principal  
50 component analysis (PCA) of the transcriptome data. **c-f** Violin plots showing the expression of  
51 select specific lineage-associated genes from the scRNA-seq data. **g** Signaling pathways that  
52 were significantly enriched in EpCAM<sup>+</sup>Gli1<sup>+</sup> cells using BioCarta gene sets for GSEA ( $p$  < 0.05).

53 **Supplementary Fig. S6 (Related to Fig. 5). Gli1<sup>+</sup> cells differentiate into hepatocytes**  
54 **during chronic injury.**

55 **a** Experimental design for lineage tracing of EpCAM<sup>+</sup> cells using EpCAM-CreERT2; Ai9 mice. **b**  
56 Schematic showing the experimental strategy. **c** Immunostaining for tdTomato (red) and  
57 EpCAM (green) in intestinal sections. Scale bar, 50  $\mu$ m. Right panels: Quantification of the  
58 percentage of tdTomato<sup>+</sup> cells expressing EpCAM. Means  $\pm$  SEM (n = 3). **d** Immunostaining  
59 for tdTomato (red) and EpCAM (green) in intestinal sections and liver sections. PV, portal vein.  
60 Scale bar, 50  $\mu$ m. Right panels: Quantification of the percentage of tdTomato<sup>+</sup> cells expressing  
61 EpCAM. Means  $\pm$  SEM (n = 3). **e** Immunostaining for GFP (red) in liver sections from Tmprss2-  
62 CreERT2; R26-YFP mice. Scale bar, 50  $\mu$ m. **f** Immunostaining for tdTomato (red) in liver  
63 sections from Tmprss2-DreERT2; R26-RSR-tdTomato mice treated with or without TAM. Scale  
64 bar, 50  $\mu$ m. **g** Immunostaining for tdTomato (red) and EpCAM (Green) or HNF4 $\alpha$ (Green) in  
65 tissue sections from livers after EpCAM-CreERT2; Ai9 mice received a DDC diet for 4 weeks.  
66 Scale bar, 50  $\mu$ m. **h** Quantification of the percentage of tdTomato<sup>+</sup> cells expressing HNF4 $\alpha$ .  
67 Means  $\pm$  SEM (n = 5). **i** Immunostaining for PDGFR $\alpha$  (Green), tdTomato (red) and HNF4 $\alpha$   
68 (brilliant blue), in tissue sections from livers after PDGFR $\alpha$ -CreERT2; Ai9 mice received a DDC  
69 diet for 4 weeks. Scale bar, 50  $\mu$ m. **j** Quantification of the percentage of tdTomato<sup>+</sup> cells  
70 expressing HNF4 $\alpha$ . Means  $\pm$  SEM (n = 5).

71 **Supplementary Fig. S7 (Related to Fig. 6). Organoids cultured from single EpCAM<sup>+</sup>Gli1<sup>+</sup>**  
72 **cells from Gli1-LacZ mice.**

73 **a** FACS gating strategy to isolate EpCAM<sup>+</sup> and tdTomato<sup>+</sup> cells. **b** Table showing the numbers  
74 used to calculate the % colony formation. **c** Schematic representation of organoid-development  
75 from EpCAM<sup>-</sup>Gli1<sup>-</sup>, EpCAM<sup>+</sup>Gli1<sup>-</sup>, EpCAM<sup>-</sup>Gli1<sup>+</sup> and EpCAM<sup>+</sup>Gli1<sup>+</sup> single cells from Gli1-LacZ  
76 mice sorted by FACS. **d** FACS plot showing the expression of EpCAM and Gli1 in the liver in  
77 Gli1-LacZ mice stained with CUG and EpCAM. **e** Representative images showing 5,000 sorted  
78 cells that grew into liver organoids 5 days after sorting. **f** Table showing the numbers used to

79 calculate the % colony formation for Gli1-LacZ mice. **g** Numbers of organoids formed per 5,000  
80 single cells (left) and percentage of colony formation efficiency (right). Means  $\pm$  SEM (n = 3).  
81 **\*\*** $p < 0.01$ .

82

# Supplementary Fig. S1

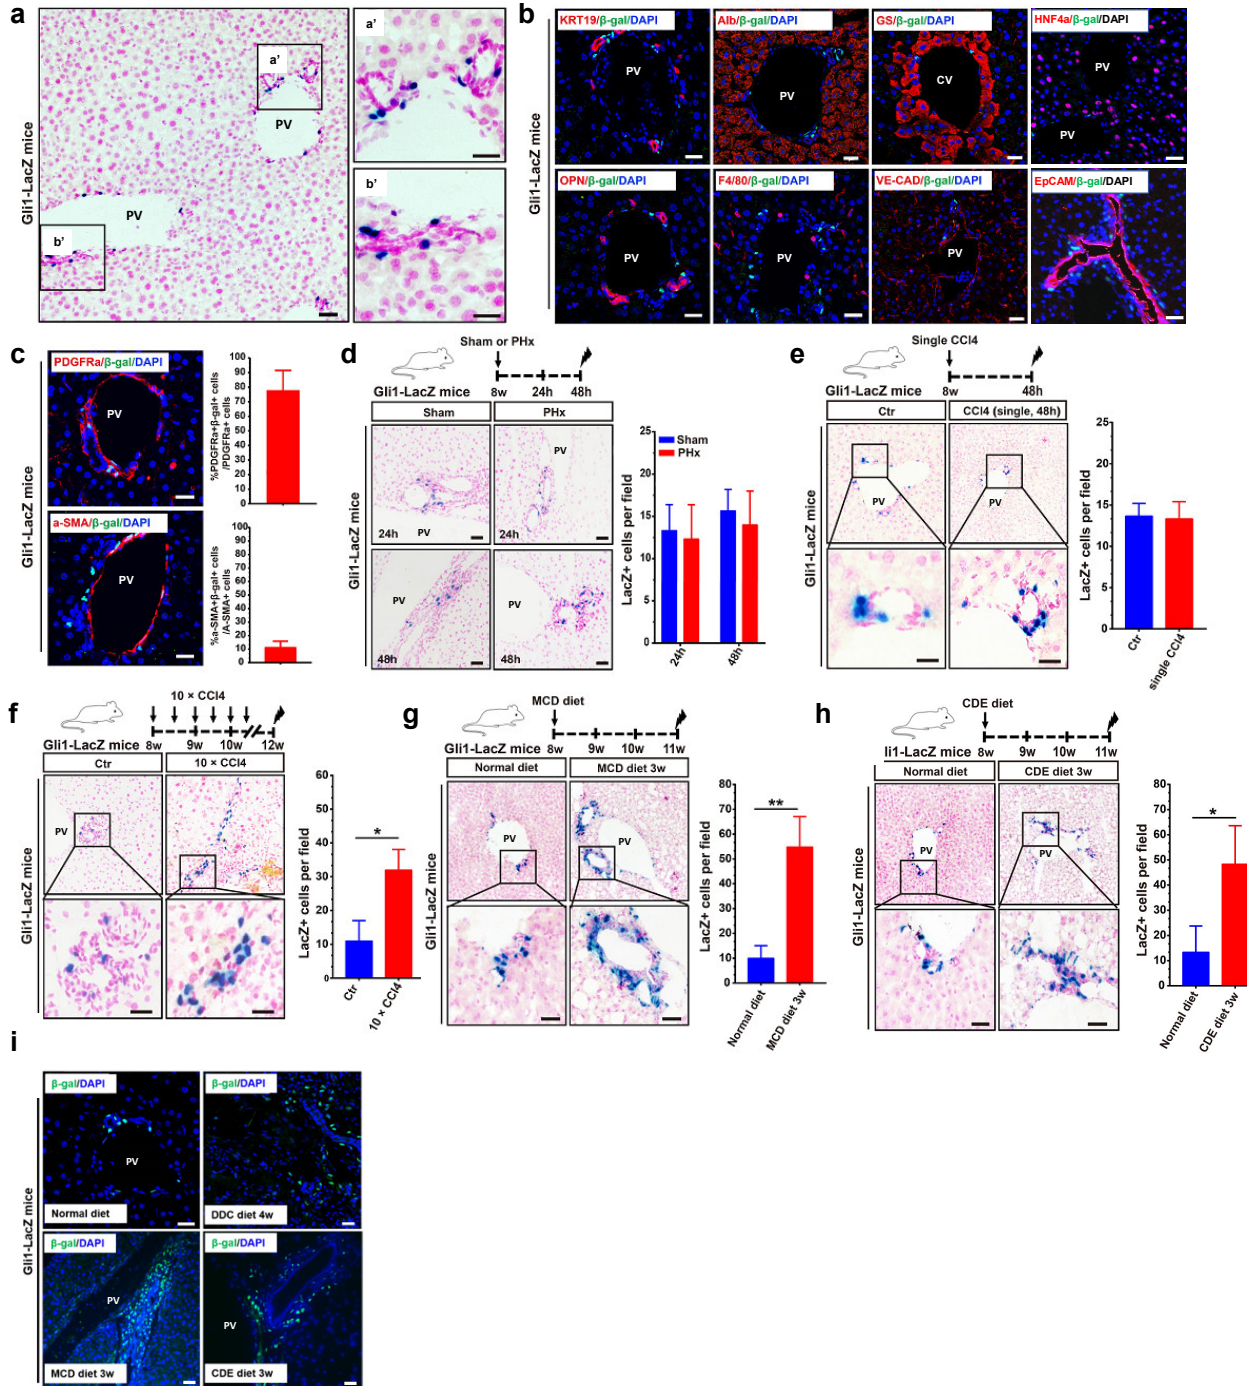

# Supplementary Fig. S2

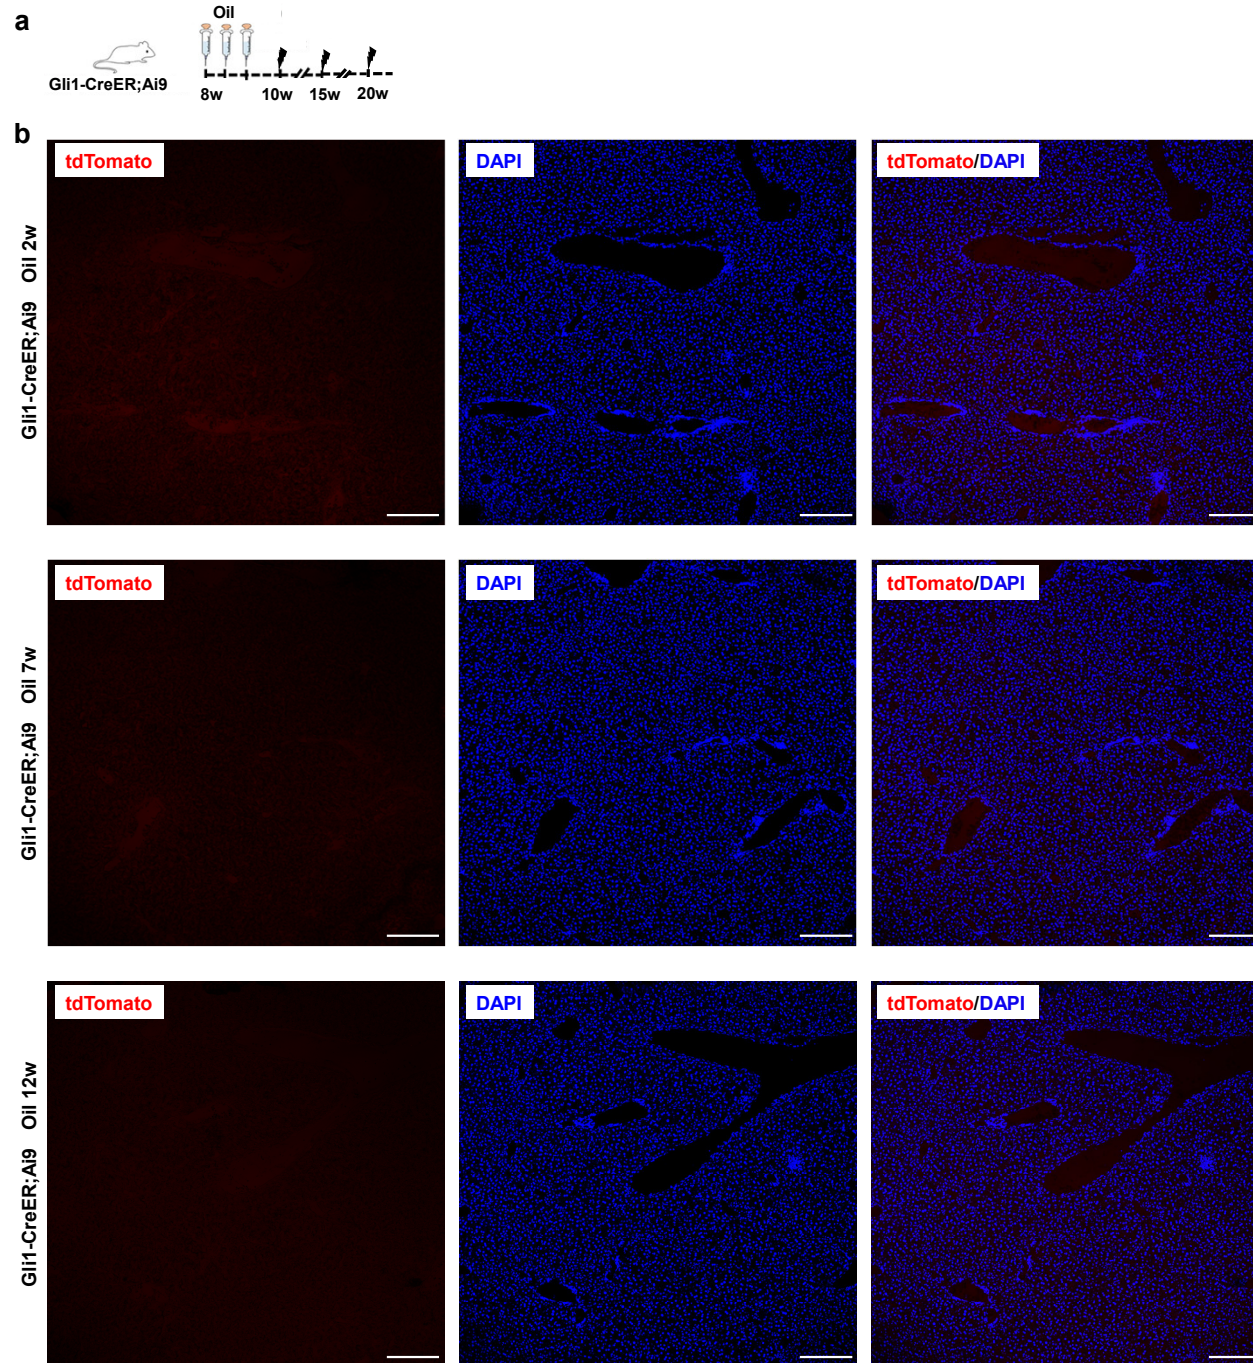

# Supplementary Fig. S3

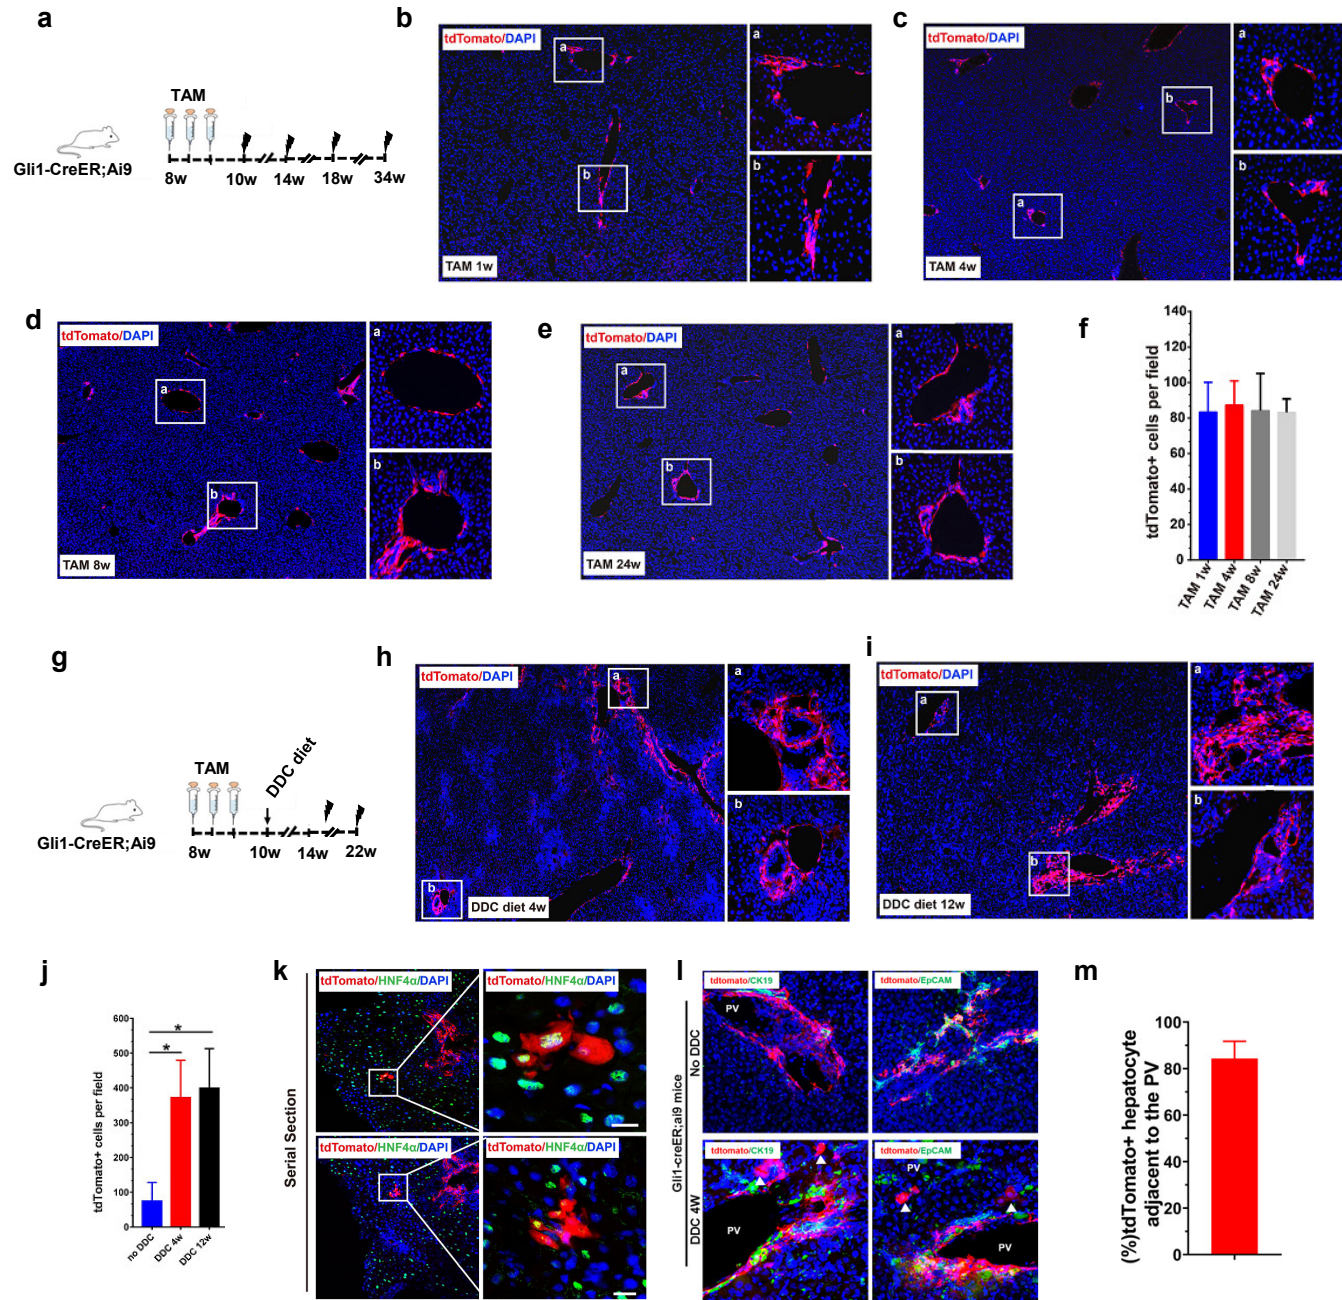

# Supplementary Fig. S4

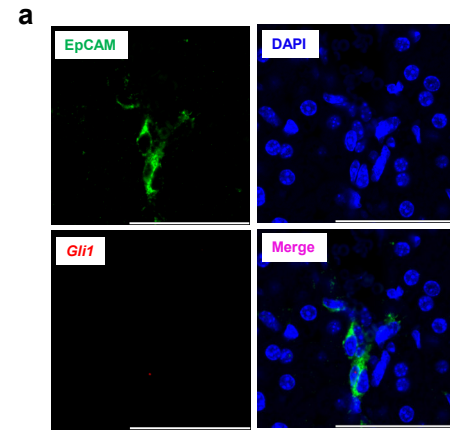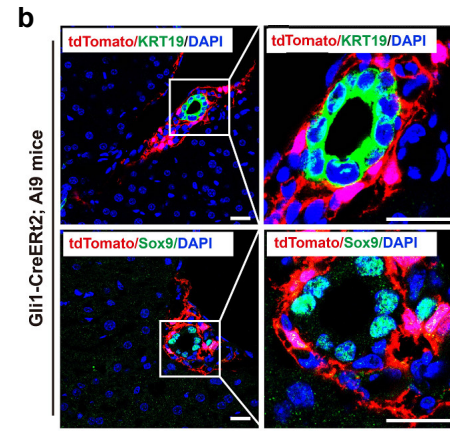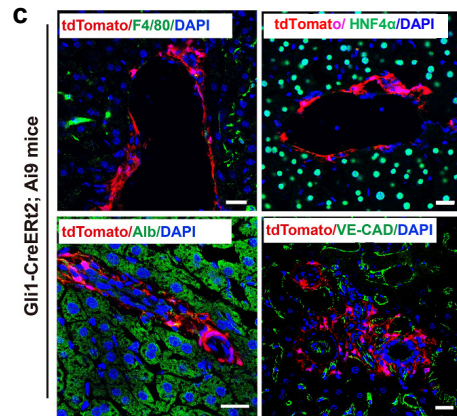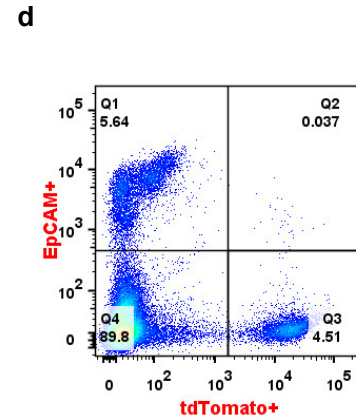



# Supplementary Fig. S5

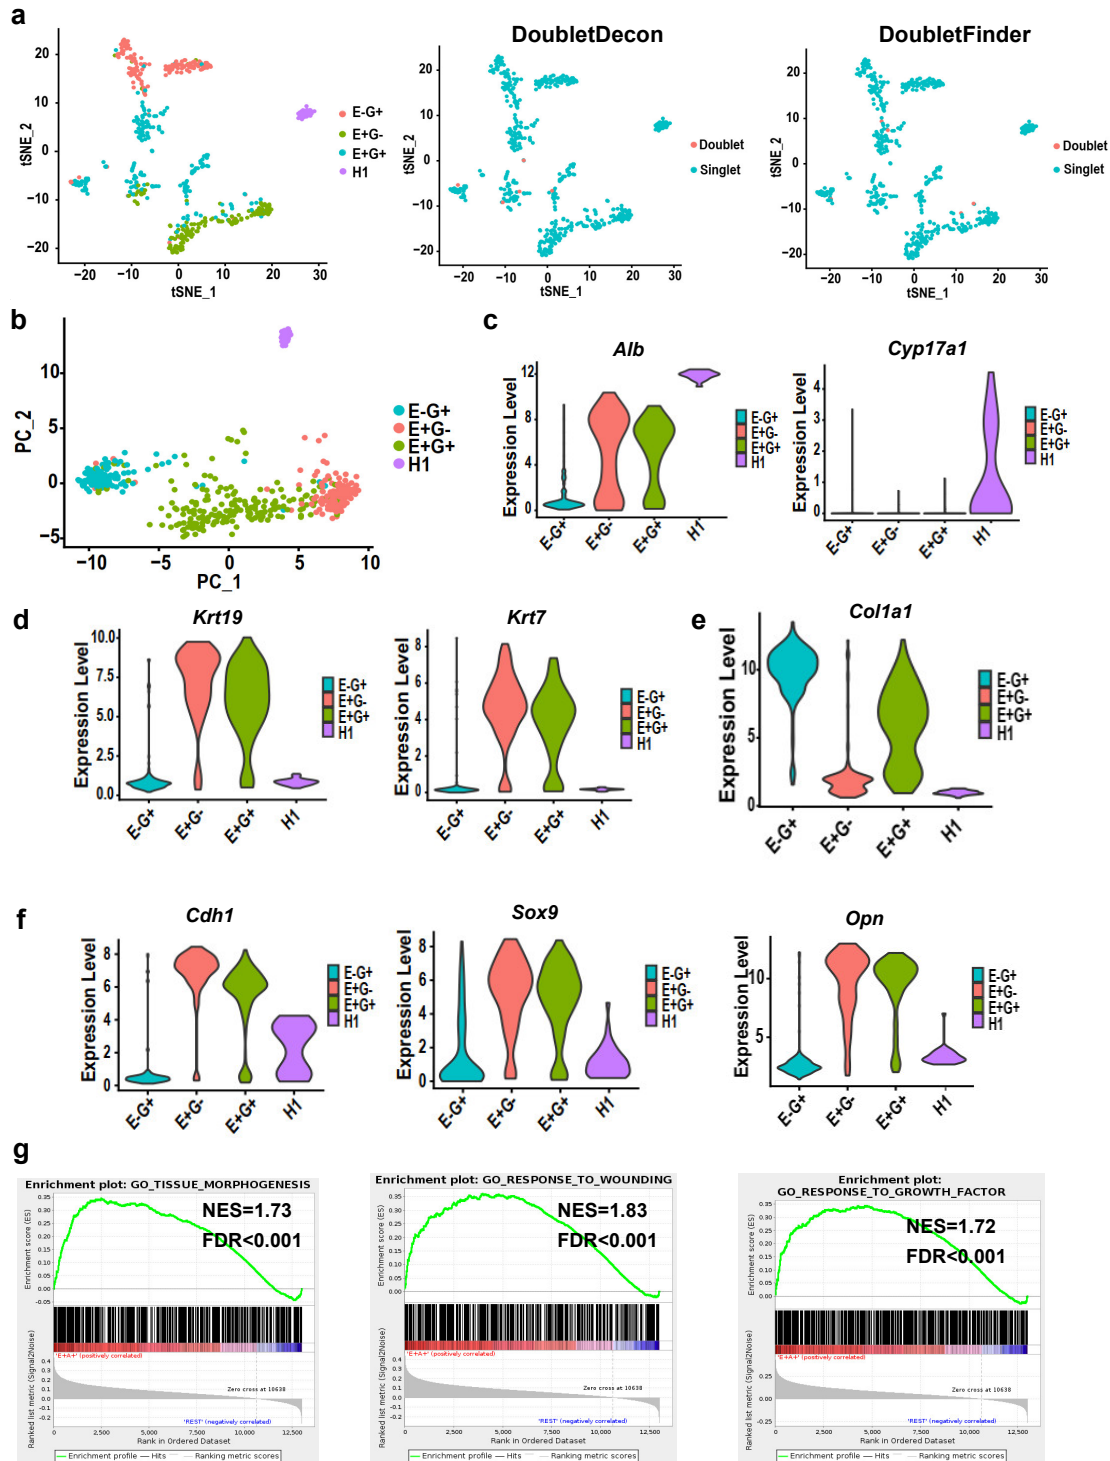

# Supplementary Fig. S6

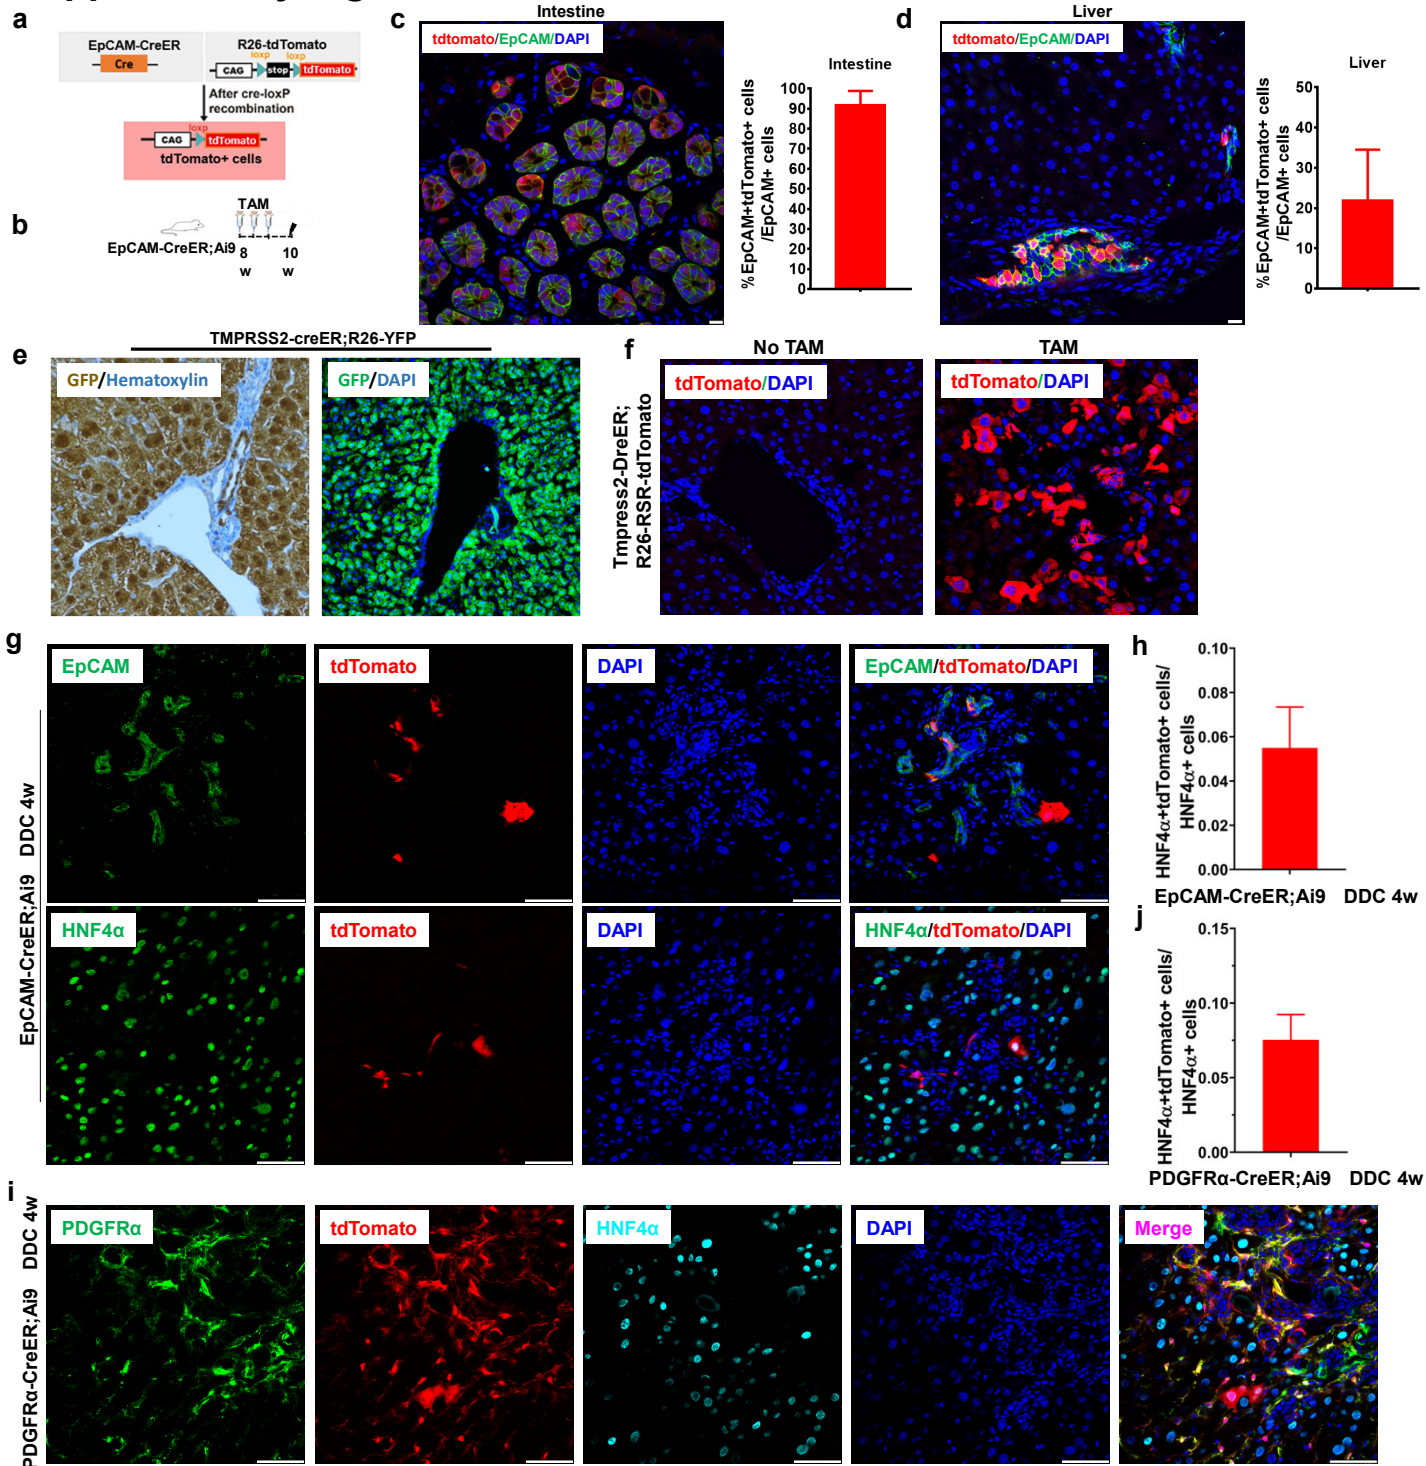

# Supplementary Fig. S7

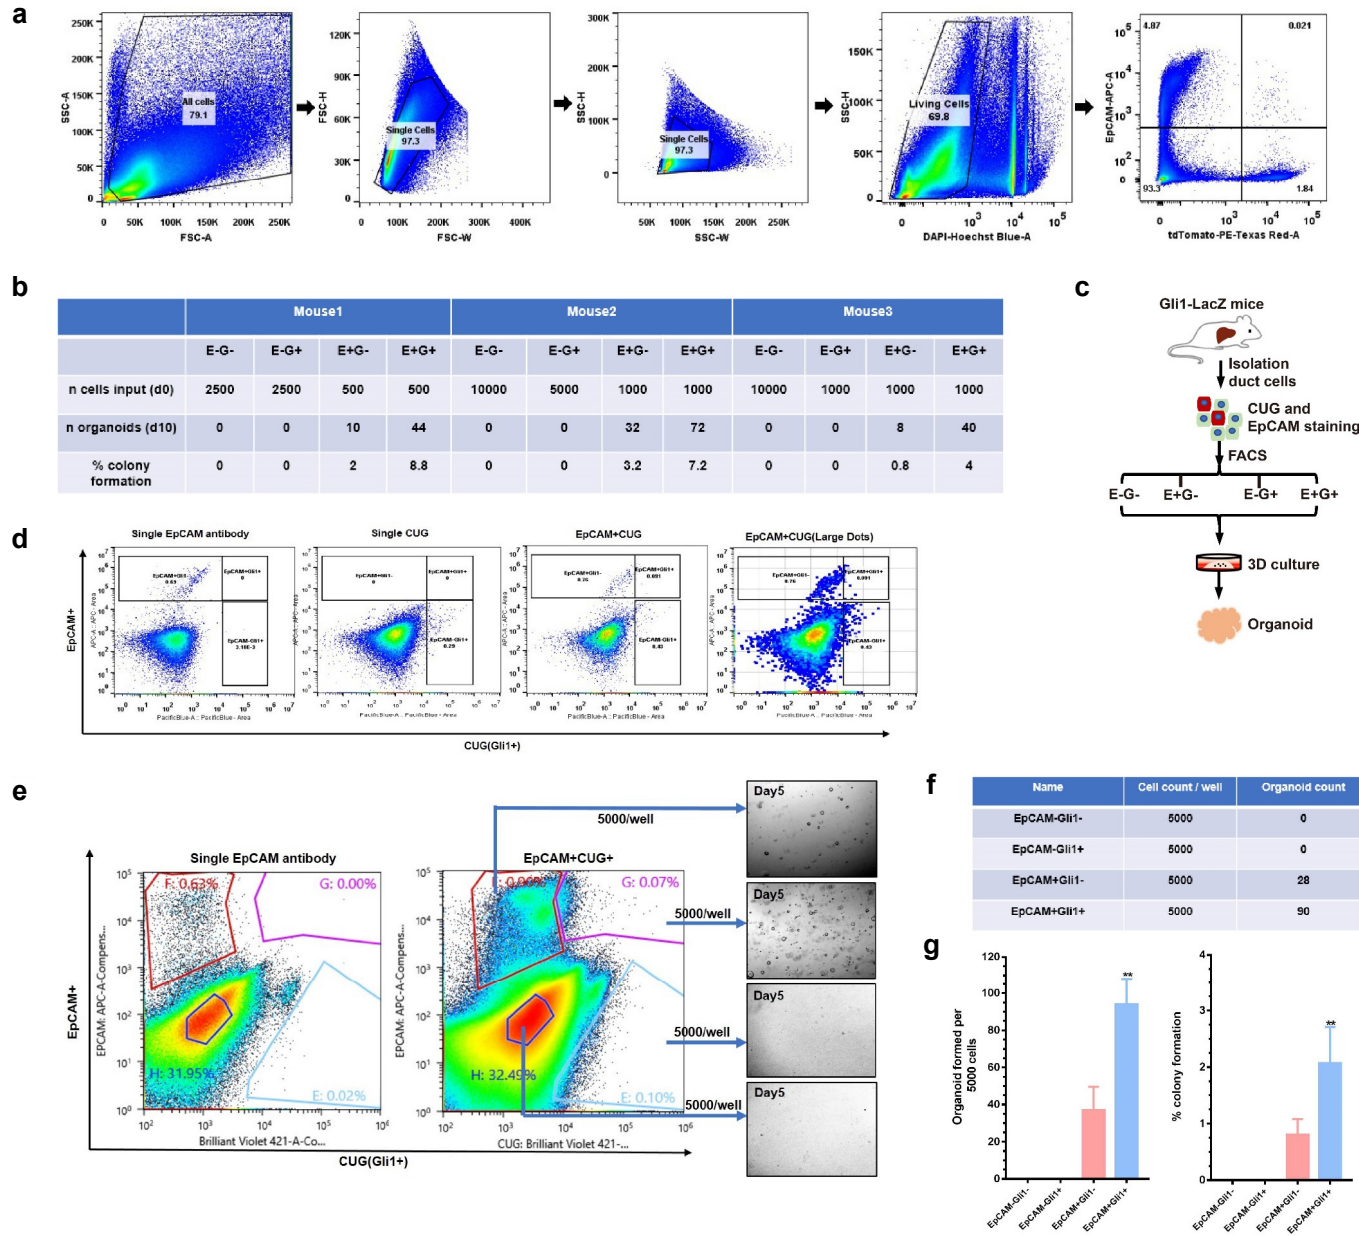

83 **Supplementary Table 1: List of primary antibodies used for immunostaining**  
 84 **experiments**

| <b>Primary antibody</b>           | <b>Species</b> | <b>Dilution</b> | <b>Source</b>  | <b>Catalog number</b> |
|-----------------------------------|----------------|-----------------|----------------|-----------------------|
| HNF4 $\alpha$                     | rabbit         | 1/250           | CST            | 3113S                 |
| E-cadherin                        | mouse          | 1/200           | BD Biosciences | 610182                |
| CK19                              | rabbit         | 1/500           | Abcam          | ab52625               |
| CK19 (Troma III)                  | rat            | 1/500           | DSHB           | AB_2133570            |
| Osteopontin(OPN)                  | goat           | 1/100           | R&D Systems    | AF808                 |
| Sox9                              | rabbit         | 1/500           | Millipore      | AB5535                |
| DsRed                             | rabbit         | 1/500           | Clontech       | 632496                |
| mcherry                           | goat           | 1/500           | SICGEN         | AB0081-200            |
| PDGFR $\alpha$                    | goat           | 1/100           | R&D Systems    | AF1062                |
| VE-CAD                            | goat           | 1/100           | R&D Systems    | AF1002                |
| EpCAM                             | rabbit         | 1/250           | Abcam          | ab71916               |
| GS                                | mouse          | 1/1000          | BD Biosciences | 610517                |
| Alb                               | mouse          | 1/250           | Sigma          | SAB3500217            |
| $\beta$ -gal                      | rabbit         | 1/250           | Abcam          | ab221199              |
| $\alpha$ -SMA<br>(Cy3-conjugated) | mouse          | 1/1000          | Sigma          | C6198                 |
| EpCAM<br>(APC-conjugated)         | rat            | 1/100           | eBioscience    | 14-5791-82            |

85

86 **Supplementary Table 2: List of primer sequences used for RT-qPCR**

| <b>Gene</b>                    | <b>Pimer sequences (5'-3')</b>                                |
|--------------------------------|---------------------------------------------------------------|
| <i>EpCAM</i>                   | Fw - TGTGGACATAGCTGATGTGGCTTAC<br>Rv - CACCCTCAGGTCCATGCTCTTA |
| <i>Krt19</i>                   | Fw - GTCCTACAGATTGACAATGC<br>Rv - CACGCTCTGGATCTGTGACA        |
| <i>GAPDH</i>                   | Fw - AGGTCGGTGTGAACGGATTTG<br>Rv - TGTAGACCATGTAGTTGAGGTCA    |
| <i>HNF4<math>\alpha</math></i> | Fw - AGCTCGAGGCTCCGTAGTGTTT<br>Rv - GAAAATGTGCAGGTGTTGACCA    |
| <i>Alb</i>                     | Fw - GCTGAGACCTTCACCTTCCA<br>Rv - TCTTCAGTTGCTCCGCTGTA        |

87

88
